# Supplementary material for: ZIF-8 engineered bismuth nanosheet arrays for boosted electrochemical reduction of nitrate
Source: Royal Society of Chemistry journal article supplement (doi:10.1039/d1nr02339j), 2021-01-01
Supplement: d1nr02339j1.pdf [file d1nr02339j1.pdf]

# **ZIF-8 engineered bismuth nanosheets arrays for direct nitrate electroreduction with boosted ammonia selectivity**

Miao Chen <sup>a</sup>, Jingtao Bi <sup>a</sup>, Xin Huang <sup>a, b\*</sup>, Jingkang Wang <sup>a, b</sup>, Ting Wang <sup>a</sup>, Zhao Wang <sup>a</sup>,  
Hongxun Hao <sup>a, b, c\*\*</sup>

<sup>a</sup> National Engineering Research Center of Industrial Crystallization Technology, School of Chemical Engineering and Technology, Tianjin University, Tianjin 300072, China

<sup>b</sup> Collaborative Innovation Center of Chemical Science and Engineering (Tianjin), Tianjin 300072, China

<sup>c</sup> School of Chemical Engineering and Technology, Hainan University, Haikou 570228, China

\* Corresponding author: Xin Huang, Hongxun Hao

Email address: x\_huang@tju.edu.cn, hongxunhao@tju.edu.cn

## Part I: Measurement of the Nitrogen-containing chemicals

### 1.1 Reagents

Sodium nitrate ( $\text{NaNO}_3$ ,  $\geq 99\%$ ), sodium nitrite ( $\text{NaNO}_2$ , 99.99%), sodium sulphate ( $\text{Na}_2\text{SO}_4$ , 99.99%), sodium hydroxide ( $\text{NaOH}$ , 99.99%), ammonium chloride ( $\text{NH}_4\text{Cl}$ , 99.998%), sodium salicylate (S3007,  $\geq 99.5\%$ ), potassium sodium tartrate ( $\text{NaKC}_4\text{H}_4\text{O}_6 \cdot 4\text{H}_2\text{O}$ ), sodium hypochlorite ( $\text{NaClO}$ , available chlorine 10-15%), sodium nitroferricyanide ( $\text{C}_5\text{FeN}_6\text{Na}_2\text{O}$ ,  $\geq 99\%$ ), p-aminobenzene sulfonamide ( $\text{C}_6\text{H}_8\text{N}_2\text{O}_2\text{S}$ ,  $\geq 99\%$ ), N- (1 naphthyl) ethylenediamine dihydrochloride ( $\text{C}_{12}\text{H}_{14}\text{N}_2 \cdot 2\text{HCl}$ , 98%), phosphoric acid ( $\text{H}_3\text{PO}_4$ , 85%), hydrochloric acid ( $\text{HCl}$ , 37%) were purchased from Sigma-Aldrich Chemical Reagent Co., Ltd.

### 1.2 Measurement of $\text{NO}_3^- - \text{N}$

The concentration of the  $\text{NO}_3^- - \text{N}$  was determined by the following procedures:

The reagent (A): 8.3 ml of  $\text{HCl}$  was diluted to 100 ml to prepare 1 M  $\text{HCl}$  solution. The reagent (B): 0.8 g of  $\text{NH}_2\text{SO}_3\text{H}$  was added into 100 mL distilled water to prepare a 0.8wt% solution.

The standard  $\text{NO}_3^- - \text{N}$  solution was prepared to calibrate concentration and absorbance curves by the following procedures:

a) 1000  $\text{mg NO}_3^- - \text{N/L}$  of  $\text{Na}_2\text{SO}_4$  solution: 0.6071 g  $\text{NaNO}_3$  was first dried in the oven for 4 h, and then dissolved to 100 ml 0.5 M  $\text{Na}_2\text{SO}_4$ . To prepare different standard solutions, the 1000 ppm  $\text{NO}_3^- - \text{N}$  solution was diluted to different concentration.

b) 10  $\text{mg NO}_3^- - \text{N/L}$  in 0.5 M  $\text{Na}_2\text{SO}_4$ : 1 mL of the prepared 1000  $\text{mg NO}_3^- - \text{N/L}$   $\text{Na}_2\text{SO}_4$  was diluted to 100 mL by adding 0.5 M  $\text{Na}_2\text{SO}_4$  solution.

c) Standard solutions: 2, 4, 8, 12, and 16 mL of the prepared  $10 \text{ mg NO}_3^- - \text{N/L Na}_2\text{SO}_4$  solution were diluted to 20 mL by adding 0.5 M  $\text{Na}_2\text{SO}_4$  solution respectively. And then 1, 2, 4, 6, 8 and  $10 \text{ mg NO}_3^- - \text{N/L}$  standard solutions were obtained.

The experiments of  $\text{NO}_3^- - \text{N}$  determination followed the below procedures: 0.1 mL reagent (A) and 0.01 mL reagent (B) were added into 5 mL of the standard solutions in steps. After placing the mixed solution in a dark environment for 20 minutes, UV-vis measurement was conducted (the final absorbance =  $A(220 \text{ nm}) - 2A(275 \text{ nm})$ ). The concentration of the  $\text{NO}_3^- - \text{N}$  in the electrolyte was also detected by the same methods in the experiments.

### 1.3 Measurement of $\text{NH}_4^+ - \text{N}$

The concentration of  $\text{NH}_4^+ - \text{N}$  was determined by the Indophenol blue method. The reagents were prepared by the following procedures:

The reagent (A): 5 g of sodium salicylate and 5 g of potassium sodium tartrate were added into 100 mL of 1 M NaOH.

The reagent (B): 3.5 mL of NaClO was added into 100 mL distilled water.

The reagent (C): 0.1 g  $\text{C}_5\text{FeN}_6\text{Na}_2\text{O}$  was added into 10 mL distilled water.

The standard  $\text{NH}_4^+ - \text{N}$  solution was prepared to calibrate concentration and absorbance curves by the following procedures:

a)  $1000 \text{ mg NH}_4^+ - \text{N/L}$  of  $\text{Na}_2\text{SO}_4$  solution: 0.3821 g  $\text{NH}_4\text{Cl}$  was first dried in the oven for 4 h, and then dissolved to 100 ml 0.5 M  $\text{Na}_2\text{SO}_4$ .

b)  $10 \text{ mg NH}_4^+ - \text{N/L}$  in 0.5 M  $\text{Na}_2\text{SO}_4$ : 1 mL of the prepared  $1000 \text{ mg NH}_4^+ - \text{N/mL}$   $\text{Na}_2\text{SO}_4$  was diluted to 100 mL by adding 0.5 M  $\text{Na}_2\text{SO}_4$  solution.

c) Standard solutions: 0.2, 0.4, 0.8, 1.2, 1.6 and 2 mL of the prepared  $10 \text{ mg NH}_4^+ - \text{N/L}$

Na<sub>2</sub>SO<sub>4</sub> were diluted to 20 mL by adding 0.5 M Na<sub>2</sub>SO<sub>4</sub> solution respectively. And then 0.1, 0.2, 0.4, 0.6, 0.8 and 1 mg NH<sub>4</sub><sup>+</sup> - N/L standard solutions were obtained.

The experiments of NH<sub>4</sub><sup>+</sup> - N determination followed the below procedures: 2 mL reagent (A) was firstly added into 2 mL standard solutions, then 1 mL reagent (B) and 0.2 mL reagent (C) were added into the standard solutions in steps. After placing the mixed solution in a dark environment for 20 minutes, UV-vis measurement (the maximum  $\lambda = 655$  nm) was conducted. The concentration of NH<sub>4</sub><sup>+</sup> - N in the experiments was also detected by the same methods.

#### 1.4 Measurement of NO<sub>2</sub><sup>-</sup> - N

The color reagent was prepared by adding 5 g C<sub>6</sub>H<sub>8</sub>N<sub>2</sub>O<sub>2</sub>S to a mixed solution of 50 ml water and 10 ml phosphoric acid and then dissolving 0.2 g C<sub>12</sub>H<sub>14</sub>N<sub>2</sub>·2HCl in the mixed solution, finally dilute above solution to 100 ml.

The standard NO<sub>2</sub><sup>-</sup> - N solution was prepared to calibrate concentration and absorbance curves by the following procedures:

a) 1000 mg NO<sub>2</sub><sup>-</sup> - N/L of Na<sub>2</sub>SO<sub>4</sub> solution: 0.4929 g NaNO<sub>2</sub> was first dried in the glass dryer for 4 h, and then dissolved to 100 ml 0.5 M Na<sub>2</sub>SO<sub>4</sub>.

b) 10 mg NO<sub>2</sub><sup>-</sup> - N/L in 0.5 M Na<sub>2</sub>SO<sub>4</sub>: 1 mL of the prepared 1000 mg NO<sub>2</sub><sup>-</sup> - N/L Na<sub>2</sub>SO<sub>4</sub> was diluted to 100 mL by adding 0.5 M Na<sub>2</sub>SO<sub>4</sub> solution.

c) Standard solutions: 0.2, 0.4, 0.8, 1.2, and 1.6 mL of the prepared 10 mg NO<sub>2</sub><sup>-</sup> - N/L Na<sub>2</sub>SO<sub>4</sub> solution were diluted to 20 mL by adding 0.5 M Na<sub>2</sub>SO<sub>4</sub> solution respectively. And then 0.1, 0.2, 0.4, 0.6, 0.8 mg NO<sub>2</sub><sup>-</sup> - N/L standard solutions were obtained.

The experiments of NO<sub>2</sub><sup>-</sup> - N determination followed the below procedures: 0.1 mL

color reagent was added into 5 mL of the standard solutions in steps. After placing the mixed solution in a dark environment for 20 minutes, UV-vis measurement (the maximum  $\lambda = 540$  nm) was conducted. The concentration of the synthesized  $\text{NO}_2^- - \text{N}$  in the electrolyte was also detected by the same methods in the experiments.

## Part II : Figures



**Fig. S1** Calibration curve of  $\text{NO}_3^- - \text{N}$  concentration and the absorbance of (A (220nm)-2A (270nm)). The fitting curve shows that the absorbance (A (220nm) - 2A (270nm)) and  $\text{NO}_3^- - \text{N}$  concentration in good linear relation ( $y = 0.2449x + 0.0168$ ,  $R^2=0.9999$ ).



**Fig. S2** Calibration curve of  $\text{NH}_4^+ - \text{N}$  concentration and the maximum absorbance. The maximum absorbance was measured at 655 nm, and the fitting curve shows good linear relation ( $y = 0.5787x + 0.0071$ ,  $R^2=0.999$ ).



**Fig. S3** Calibration curve of  $\text{NO}_2^-$ -N ion concentration and the maximum absorbance. The maximum absorbance was measured at 540 nm, and the fitting curve shows good linear relation ( $y = 3.291x + 0.002$ ,  $R^2=0.9999$ ).



**Fig. S4** (a) the SEM image of BiOI-CC, (b) the SEM image of Bi-CC electrochemical reduced from the BiOI-CC, (c) the SEM image of ZIF-8/Bi-CC, (d-e) SEM image of the interface Bi-CC, (f) TEM image of the nanosheets peeled off the ZIF-8/Bi-CC.



**Fig. S5** SAED images of BiOI nanosheets peeled off from the carbon cloth.



**Fig. S6** The SEM-EDX images of BiOI-CC shows the even distribution of O, I and Bi.



**Fig. S7** (a) the Full XPS spectrum of Bi-CC transformed from BiOI-CC, (b) the O1s spectrum of ZIF-8/Bi-CC.



**Fig. S8** The SEM-EDX images of ZIF-8/Bi-CC shows the even distribution of C, N, Zn and Bi.



**Fig. S9** TEM-Mapping images of the nanosheets peel off the ZIF-8/Bi-CC.



**Fig. S10** Weight loss analysis of ZIF-8/Bi-CC by thermogravimetric analysis (TGA) in air.



**Fig. S11** (a), (b) SEM images of BiOCl-CC with different scales and (c) SEM image of the Bi-CC electrochemical reduced from the BiOCl-CC.



**Fig. S12** (a), (b) SEM images of BiOBr-CC with different scales and (c) SEM image of the Bi-CC electrochemical reduced from the BiOBr-CC.



**Fig. S13** (a) The XRD spectra of carbon cloth, BiOCl-CC, and Bi-CC, respectively; (b) The XRD spectra of the carbon cloth, BiOBr-CC, and Bi-CC, respectively.



**Fig. S14** LSV curves of the obtained Bi-CC by the electroreduction from different precursors in 0.5 M  $\text{Na}_2\text{SO}_4$ .



**Fig. S15**  $\text{N}_2$  adsorption-desorption isotherms and pore size distributions (desorption branch) of carbon cloth, ZIF-8/CC, Bi-CC and ZIF-8/Bi-CC.



**Fig. S16** Characterization of the HER electrocatalytic activity of ZIF-8/CC: (a) LSV curve with IR corrected in 0.5 M Na<sub>2</sub>SO<sub>4</sub> within 50 ppm NO<sub>3</sub><sup>-</sup> - N; (b) corresponding Tafel plot derived from (a); (c) electrochemical impedance spectroscopy curves of ZIF-8/CC were performed in 0.5 M Na<sub>2</sub>SO<sub>4</sub> within 0.01–10<sup>5</sup> Hz at open circuit voltage; (d) charge current differences plotted against a scan rate in the ZIF-8/CC.



**Fig. S17** LSV curves of the obtained Bi-CC with IR corrected in 0.5 M Na<sub>2</sub>SO<sub>4</sub> with and without the addition of 50 ppm NO<sub>3</sub><sup>-</sup> - N.



**Fig. S18** Electrochemical impedance spectroscopy curves of Bi-CC and ZIF-8/Bi-CC were performed in 0.5 M  $\text{Na}_2\text{SO}_4$  ( $\text{pH}=3\pm 0.2$ ) within  $0.01 - 10^5$  Hz at open circuit voltage with an amplitude of 10 mV.



**Fig. S19** The  $\text{NO}_3^- - \text{N}$  residual and  $\text{NO}_2^- - \text{N}$  selectivity of different reaction parameters: (a) PH, (c) current density, (d)  $\text{Cl}^-$  concentration.



**Fig. S20** Water contact angle measurement of (a) Bi-CC and (b) ZIF-8/Bi-CC.



**Fig. S21** (a-c) Electrochemically active surface area measurement of CV in the non-faradaic region for ZIF-8/CC, Bi-CC and ZIF-8/Bi-CC. The catalysts' ECSA was calculated using  $ECSA = C_{dl}/C_s$ , where  $C_{dl}$  is the catalyst's double-layer capacitance, which was determined by the slope of the obtained linear equation of  $(J_a - J_b)/2$  and CV scan rates within a nonfaradaic region.  $C_s$  stands for the catalyst's specific capacitance, and  $C_s = 0.030 \text{ mF cm}^{-2}$  was adopted in this study.



**Fig. S22** Electrochemical reduction of  $\text{NO}_2^- \text{-N}$  by ZIF-8/Bi-CC at the current density of  $10 \text{ mA cm}^{-2}$  in  $0.5 \text{ M Na}_2\text{SO}_4$  and  $50 \text{ ppm NO}_2^- \text{-N}$ .



**Fig. S23** (a), (b) SEM images with different scales, and (c) full XPS spectrum of the ZIF-8/Bi-CC after long-term tested.



**Fig. S24** TEM mapping of nanosheets peel form the tested ZIF-8/Bi-CC after long-term test.

### Part III: Tables

**Table S1.** Summary of the BET surface area,  $C_{dl}$ , and ECSA of the CC, ZIF-8-CC, Bi-CC and ZIF-8/Bi-CC.

| Sample      | BET surface area ( $\text{m}^2 \text{g}^{-1}$ ) | $C_{dl}$ ( $\text{mF cm}^{-2}$ ) | ECSA ( $\text{cm}^2$ ) |
|-------------|-------------------------------------------------|----------------------------------|------------------------|
| ZIF-8/CC    | 17.0                                            | 0.8                              | 27.3                   |
| Bi-CC       | 4.0                                             | 3.0                              | 99.3                   |
| ZIF-8/Bi-CC | 30.3                                            | 4.6                              | 154.3                  |

**Table S2.** The energy efficiency of different current density.

| Current density (mA cm <sup>-2</sup> )                         | 5    | 10 | 15    | 20  |
|----------------------------------------------------------------|------|----|-------|-----|
| Energy consumption<br>(kwh/kg NO <sub>3</sub> <sup>-</sup> -N) | 64.6 | 73 | 121.4 | 176 |

**Table S3.** The nitrate reduction reaction process equations

| Equations                                                          |
|--------------------------------------------------------------------|
| $NO_3^- + 2H^+ + 2e^- \rightarrow NO_2^- + H_2O$ (S1)              |
| $NO_3^-(ads) + e^- \rightarrow NO_3^{2-}(ads)$ (S2)                |
| $NO_3^{2-}(ads) + H_2O \rightarrow NO_2^-(ads) + 2OH^-$ (S3)       |
| $NO_2^-(ads) + e^- \rightarrow NO_2^-(ads) + 2H_2O$ (S4)           |
| $NO_2^-(ads) + e^- \rightarrow NO_2^{2-}(ads)$ (S5)                |
| $NO_2^{2-}(ads) + H_2O \rightarrow NO^-(ads) + 2OH^-$ (S6)         |
| $NO^-(ads) + H^+ + e^- \rightleftharpoons HNO^-(ads)$ (S7)         |
| $HNO^-(ads) + H^+ + e^- \rightleftharpoons H_2NO^-(ads)$ (S8)      |
| $H_2NO^-(ads) + H^+ + e^- \rightleftharpoons H_2NOH^-(ads)$ (S9)   |
| $H_2NOH^-(ads) + H^+ \rightleftharpoons H_3NOH^+(ads)$ (S10)       |
| $H_2NOH^-(ads) + 2H^+ + 2e^- \rightleftharpoons NH_3 + H_2O$ (S11) |

**Table S4.** The composition of the real wastewater (initial PH=6.29)

| <b>Ions</b>                     | <b>Concentration (ppm)</b> |
|---------------------------------|----------------------------|
| K                               | 4.13*10 <sup>3</sup>       |
| Na                              | 1.36*10 <sup>4</sup>       |
| Ca                              | 47.8                       |
| Mg                              | 0.27                       |
| Fe                              | 0.03                       |
| Ba                              | 0.02                       |
| Zn                              | 0.069                      |
| Mn                              | 0.74                       |
| Ni                              | 0.008                      |
| Cl <sup>-</sup>                 | 3.75*10 <sup>4</sup>       |
| SO <sub>4</sub> <sup>2-</sup>   | 24                         |
| NO <sub>3</sub> <sup>-</sup> -N | 14.5                       |
| NH <sub>4</sub> <sup>+</sup> -N | 15.1                       |
| Si                              | 0.82                       |
| Suspended matter                | 130                        |
| Dissolved solids                | 6.45*10 <sup>4</sup>       |

**Table S5.** Comparison of the NITRR performance among ZIF-8/Bi-CC with other NITRR electrocatalysts

| Catalyst                                             | System                                                                                                                | Performance                                               | Detecting method              | Ref.      |
|------------------------------------------------------|-----------------------------------------------------------------------------------------------------------------------|-----------------------------------------------------------|-------------------------------|-----------|
| ZIF-8/Bi-CC                                          | Graphite   0.5 M Na <sub>2</sub> SO <sub>4</sub> , 50 ppm NO <sub>3</sub> <sup>-</sup> -N (10 mA cm <sup>-2</sup> )   | S (NH <sub>3</sub> ): 84.2%                               | UV-Vis spectroscopy           | This work |
| Co <sub>3</sub> O <sub>4</sub> /Ti                   | Ir-Ru/Ti   0.05 M Na <sub>2</sub> SO <sub>4</sub> , 50 ppm NaNO <sub>3</sub> (10 mA cm <sup>-2</sup> )                | S (NH <sub>3</sub> ): 32%                                 | UV-Vis spectroscopy           | 1         |
| Co <sub>3</sub> O <sub>4</sub> /Ti                   | Ir-Ru/Ti   0.5 M Na <sub>2</sub> SO <sub>4</sub> , 50 ppm NO <sub>3</sub> <sup>-</sup> -N (5.72 mA cm <sup>-2</sup> ) | S (NH <sub>3</sub> ): 80%                                 | UV-Vis spectroscopy           | 2         |
| Co <sub>3</sub> O <sub>4</sub> -TiO <sub>2</sub> /Ti | Ir-Ru/Ti   0.01 M Na <sub>2</sub> SO <sub>4</sub> , 50 mg L <sup>-1</sup> NaNO <sub>3</sub> (10 mA cm <sup>-2</sup> ) | S (NH <sub>3</sub> ): 80%                                 | UV-Vis spectroscopy           | 3         |
| Zero valent titanium (ZVT)                           | ZVT sheet   25.9 mg N/L + 12 ppm Cl (2.0 mA cm <sup>-2</sup> )                                                        | S (NH <sub>3</sub> ): 6%                                  | Ion chromatograph             | 4         |
| Pd-Cu/cAl <sub>2</sub> O <sub>3</sub>                | graphite   1000 ppm KNO <sub>3</sub> (10 mA cm <sup>-2</sup> )                                                        | S(NH <sub>3</sub> ): 16.5%                                | UV-Vis spectroscopy           | 5         |
| Fe@ N-C                                              | Pt   50 mM Na <sub>2</sub> SO <sub>4</sub> , 50 ppm NO <sub>3</sub> <sup>-</sup> -N (1.3 V vs. SCE)                   | S (NH <sub>3</sub> ): <75%                                | Nessler's reagent             | 6         |
| Ni-Fe <sup>0</sup> /Fe <sub>3</sub> O <sub>4</sub>   | Pt   50ppm NaNO <sub>3</sub> , 10mM NaCl (5 mA cm <sup>-2</sup> )                                                     | S(NH <sub>3</sub> ): 10.44%                               | UV-Vis spectroscopy           | 7         |
| Cu <sub>50</sub> Ni <sub>50</sub>                    | Pt   1 M KOH, 10mM KNO <sub>3</sub> (0V versus RHE)                                                                   | FE(NH <sub>3</sub> ): 93%<br>S(NH <sub>3</sub> ): 81.2%   | UV-Vis spectroscopy<br>1H NMR | 8         |
| Cu/Cu <sub>2</sub> O                                 | Pt   0.5 M Na <sub>2</sub> SO <sub>4</sub> , 50 ppm NO <sub>3</sub> <sup>-</sup> -N (-0.85V vs RHE)                   | FE(NH <sub>3</sub> ): 95.8%<br>S(NH <sub>3</sub> ): 81.2% | UV-Vis spectroscopy<br>1H NMR | 9         |
| Cu nanosheet                                         | Pt   1 M KOH, 10mM KNO <sub>3</sub> (-0.15 V versus RHE)                                                              | FE(NH <sub>3</sub> ):99.7%                                | UV-Vis spectroscopy<br>1H NMR | 10        |
| TiO <sub>2-x</sub>                                   | Pt   0.5 M Na <sub>2</sub> SO <sub>4</sub> , 50 ppm NO <sub>3</sub> <sup>-</sup> -N (-1.6 V vs SCE)                   | FE(NH <sub>3</sub> ): 85.0%<br>S(NH <sub>3</sub> ): 87.1% | UV-Vis spectroscopy<br>1H NMR | 11        |

## Reference in the supporting information

1. L. Su, K. Li, H. Zhang, M. Fan, D. Ying, T. Sun, Y. Wang and J. Jia, *Water Res.*, 2017, **120**, 1-11.
2. C. Li, K. Li, C. Chen, Q. Tang, T. Sun and J. Jia, *Sep. Purif. Technol.*, 2020, **237**.
3. J. Gao, B. Jiang, C. Ni, Y. Qi, Y. Zhang, N. Oturan and M. A. Oturan, *Appl Catal B: Environ*, 2019, **254**, 391-402.
4. F. Yao, Q. Yang, Y. Zhong, X. Shu, F. Chen, J. Sun, Y. Ma, Z. Fu, D. Wang and X. Li, *Water Res.*, 2019, **157**, 191-200.
5. Z. Zhang, Y. Xu, W. Shi, W. Wang, R. Zhang, X. Bao, B. Zhang, L. Li and F. Cui, *Chemical Engineering Journal*, 2016, **290**, 201-208.
6. W. Duan, G. Li, Z. Lei, T. Zhu, Y. Xue, C. Wei and C. Feng, *Water Res*, 2019, **161**, 126-135.
7. Z. A. Jonoush, A. Rezaee and A. Ghaffarinejad, *J. Clean. Prod.*, 2020, **242**.
8. Y. Wang, A. Xu, Z. Wang, L. Huang, J. Li, F. Li, J. Wicks, M. Luo, D. H. Nam, C. S. Tan, Y. Ding, J. Wu, Y. Lum, C. T. Dinh, D. Sinton, G. Zheng and E. H. Sargent, *J. Am. Chem. Soc.*, 2020, **142**, 5702-5708.
9. Y. Wang, W. Zhou, R. Jia, Y. Yu and B. Zhang, *Angewandte Chemie*, 2020, **59**, 5350-5354.
10. X. Fu, X. Zhao, X. Hu, K. He, Y. Yu, T. Li, Q. Tu, X. Qian, Q. Yue, M. R. Wasielewski and Y. Kang, *Appl. Mater. Today*, 2020, **19**.
11. R. Jia, Y. Wang, C. Wang, Y. Ling, Y. Yu and B. Zhang, *ACS Catal.*, 2020, **10**, 3533-3540.
